# Supplementary figures and images for: Evolutionary primacy of sodium bioenergetics
Source: Springer Nature journal article supplement (doi:10.1186/1745-6150-3-13), 2008-04-01

H<sup>+</sup> or Na<sup>+</sup>

**A**

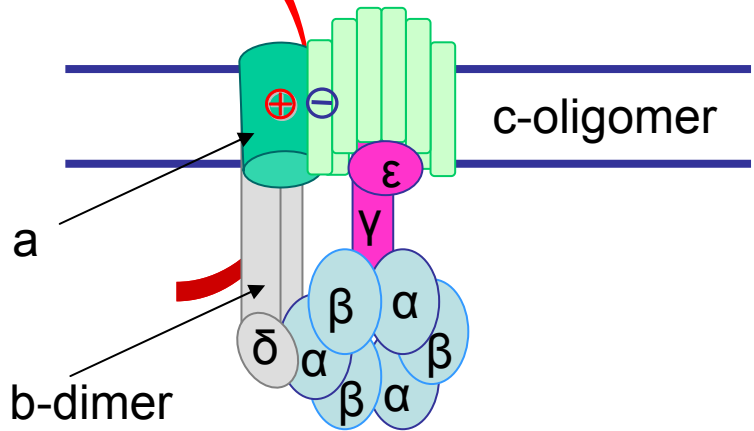

**F-type ATPase**

H<sup>+</sup> or Na<sup>+</sup>

**B**

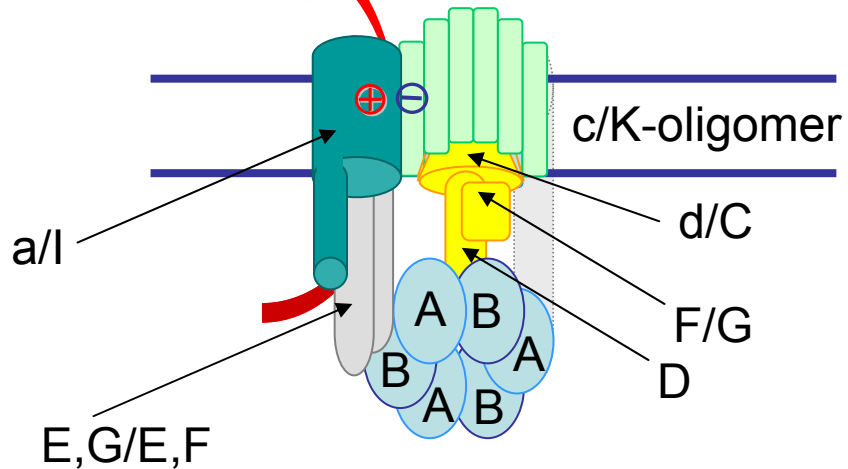

**V-type ATPase**

Supplement: 13062_2008_91_MOESM3_ESM.pdf [file 13062_2008_91_MOESM3_ESM.pdf]

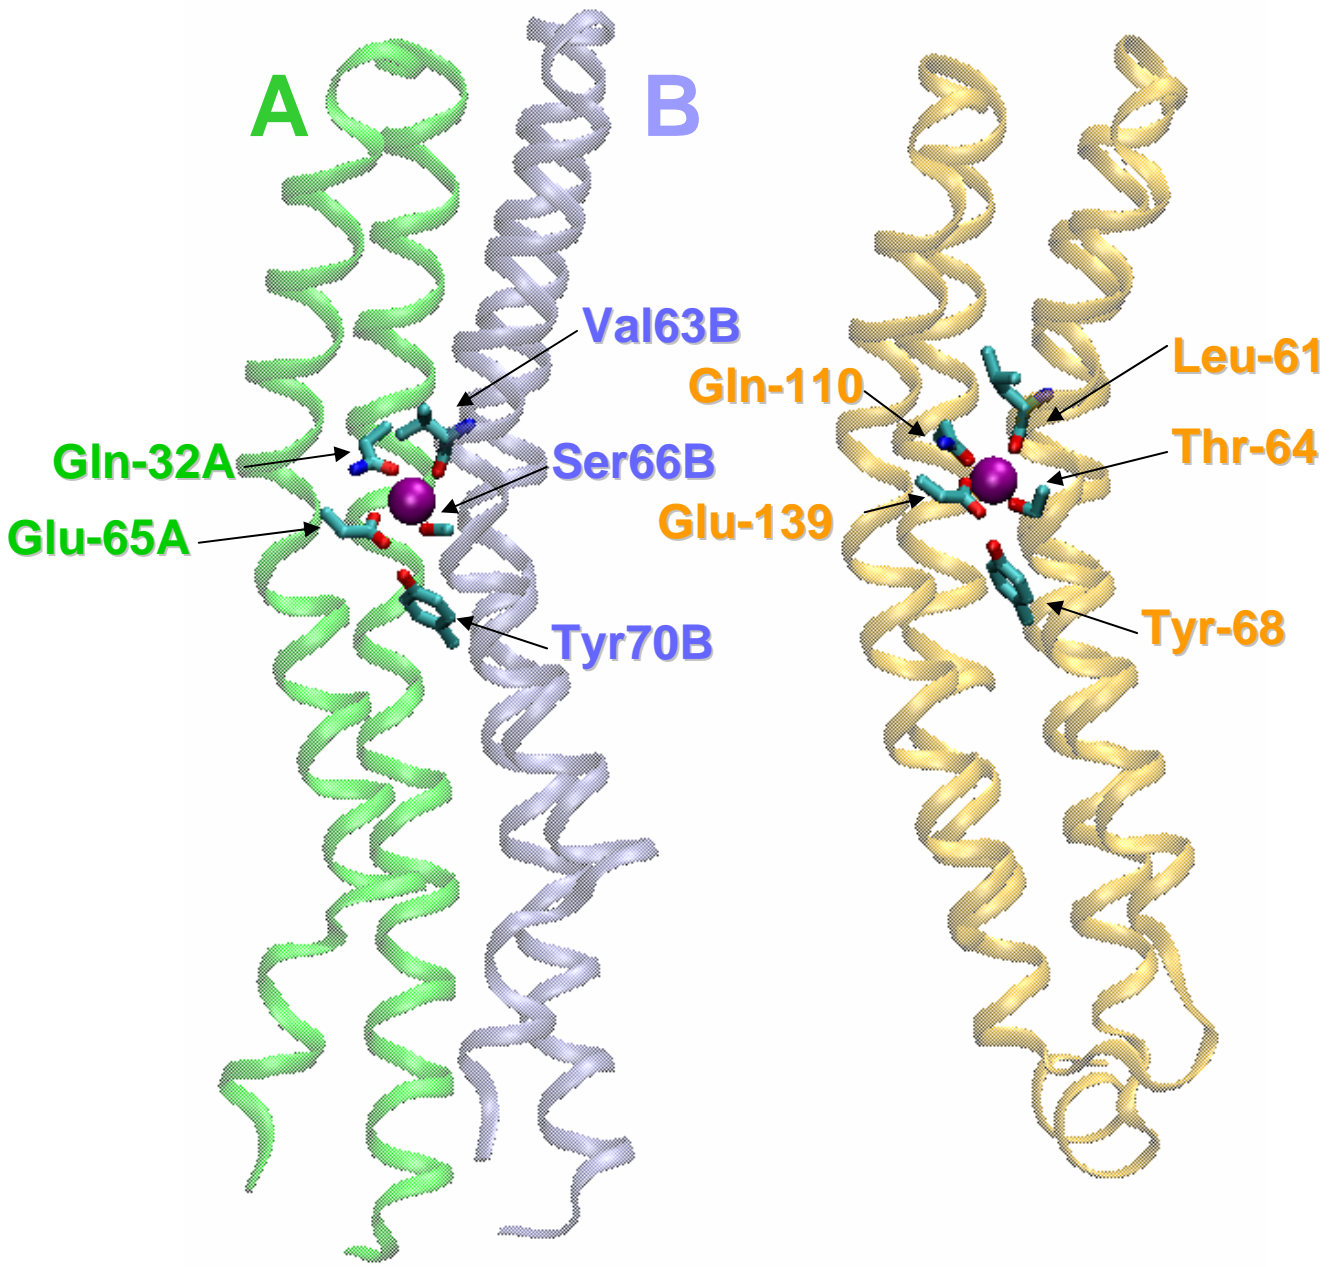

F-ATP synthase, *I. tartaricus*

V-ATP synthase, *E. hirae*

Supplement: 13062_2008_91_MOESM4_ESM.pdf [file 13062_2008_91_MOESM4_ESM.pdf]

**F-Gln62A/  
V-Gln110**

**F-Val63B/  
V-Leu61**

**F-Glu65A /  
V-Glu139**

**F-Ser66B/  
V-Thr64**

**F-Tyr70B/  
V-Tyr68**

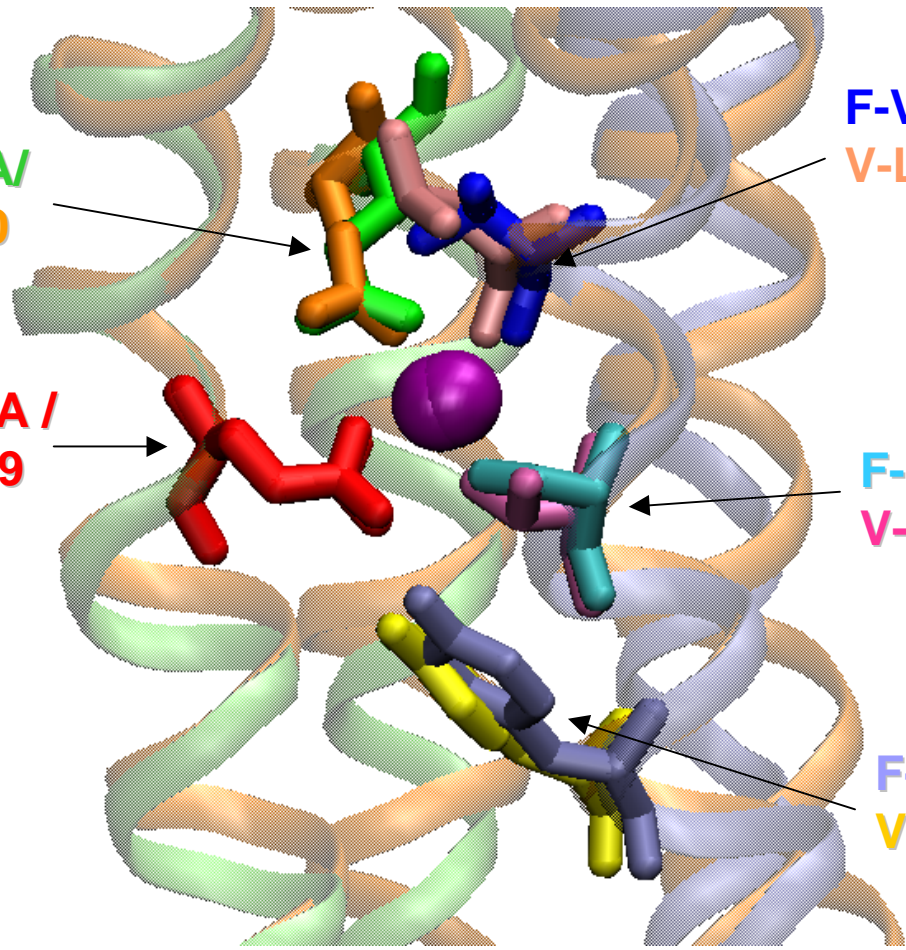

Supplement: 13062_2008_91_MOESM5_ESM.pdf [file 13062_2008_91_MOESM5_ESM.pdf]

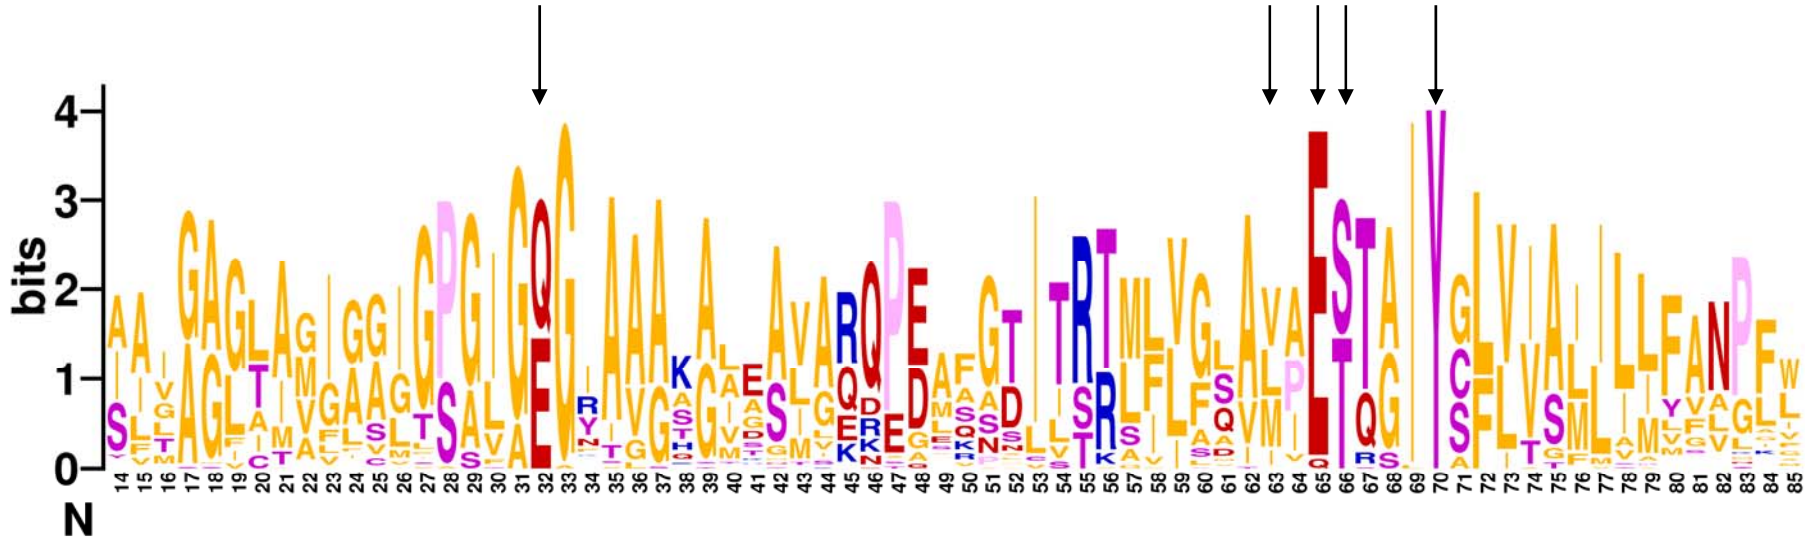

C

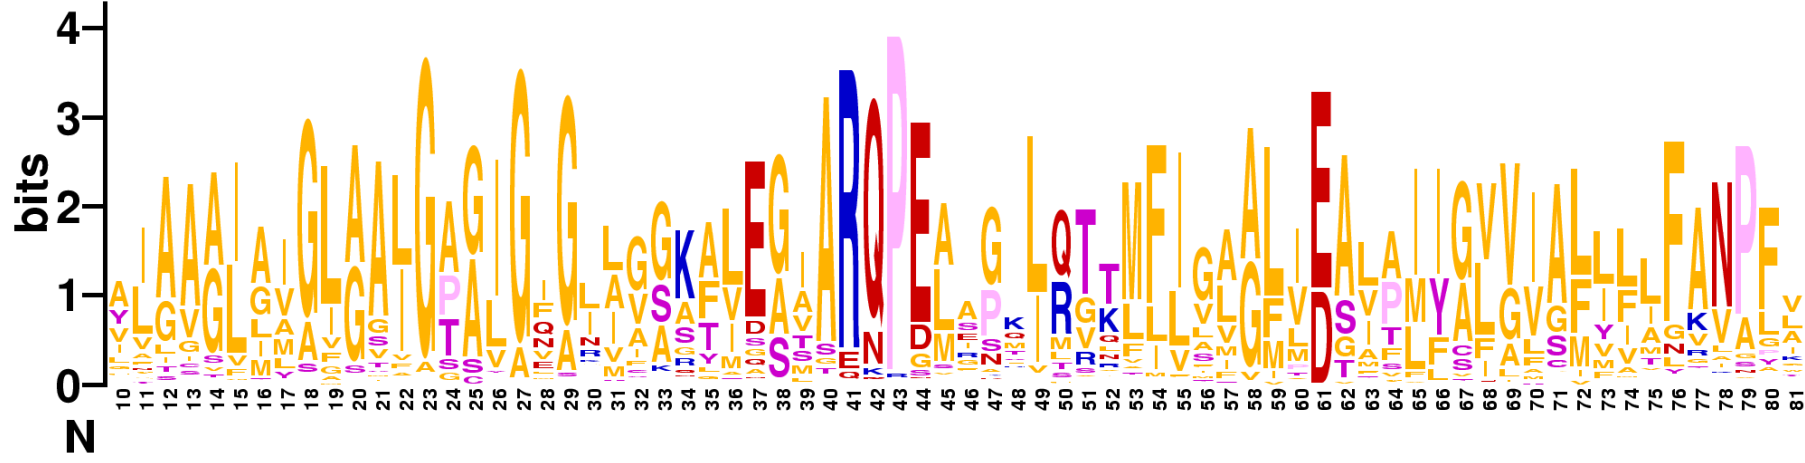

C

Supplement: 13062_2008_91_MOESM6_ESM.pdf [file 13062_2008_91_MOESM6_ESM.pdf]

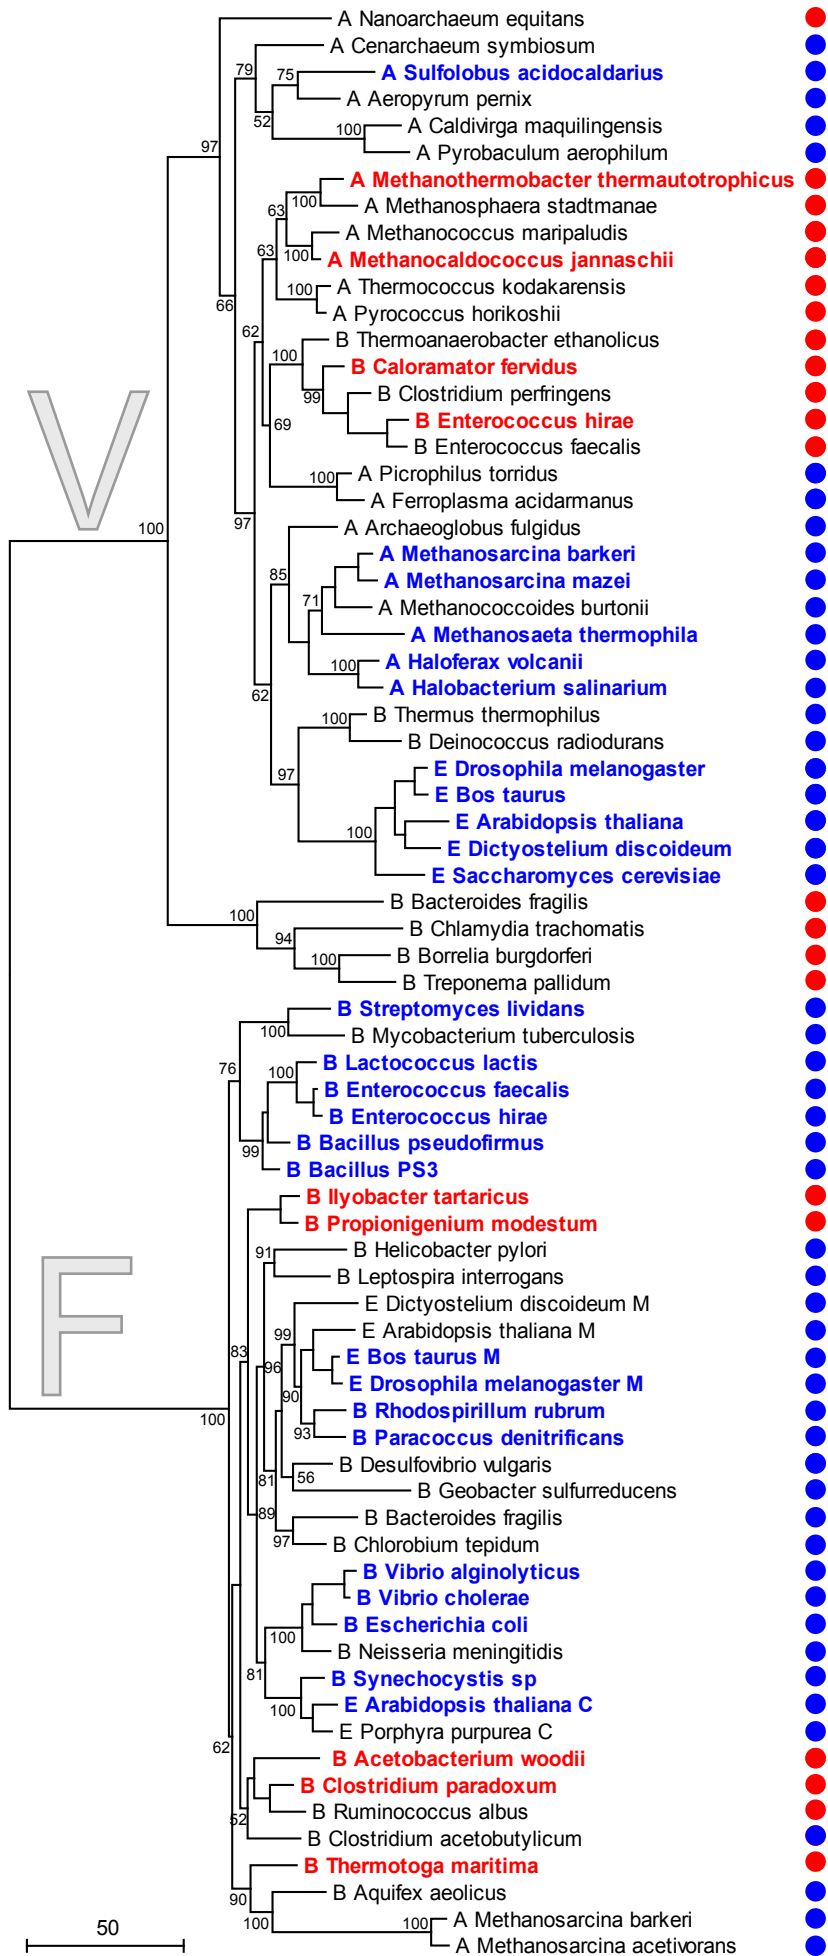

Supplement: 13062_2008_91_MOESM7_ESM.pdf [file 13062_2008_91_MOESM7_ESM.pdf]

a.

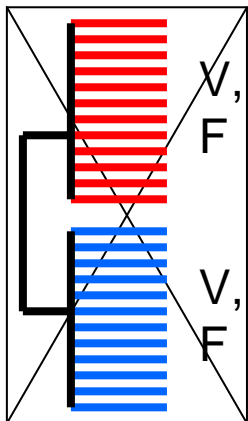

0.0000

c.

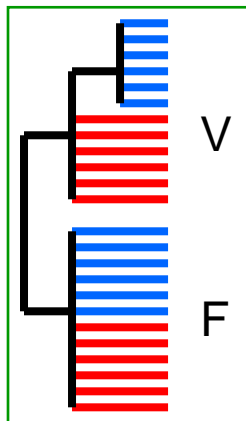

0.4963

d.

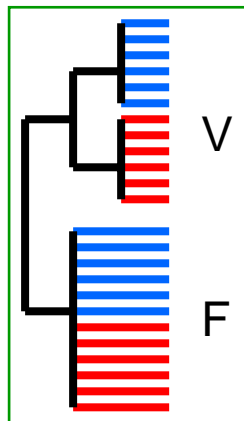

0.1872

e.

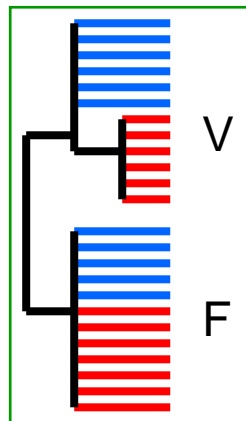

0.3910

b.

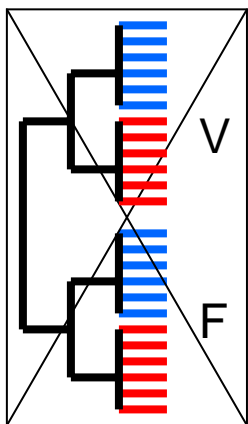

0.0000

f.

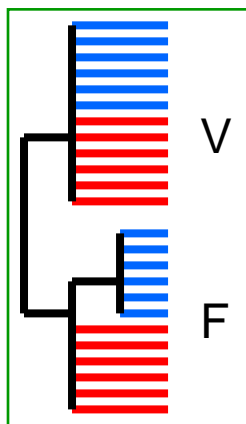

0.0723

g.

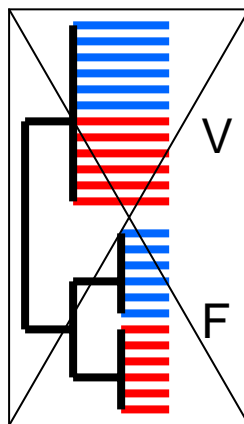

0.0205

h.

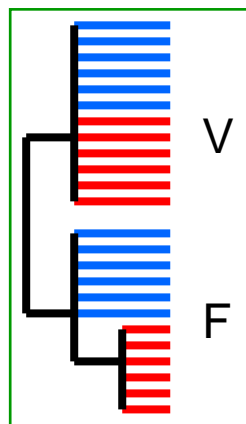

0.1325

Supplement: 13062_2008_91_MOESM8_ESM.pdf [file 13062_2008_91_MOESM8_ESM.pdf]

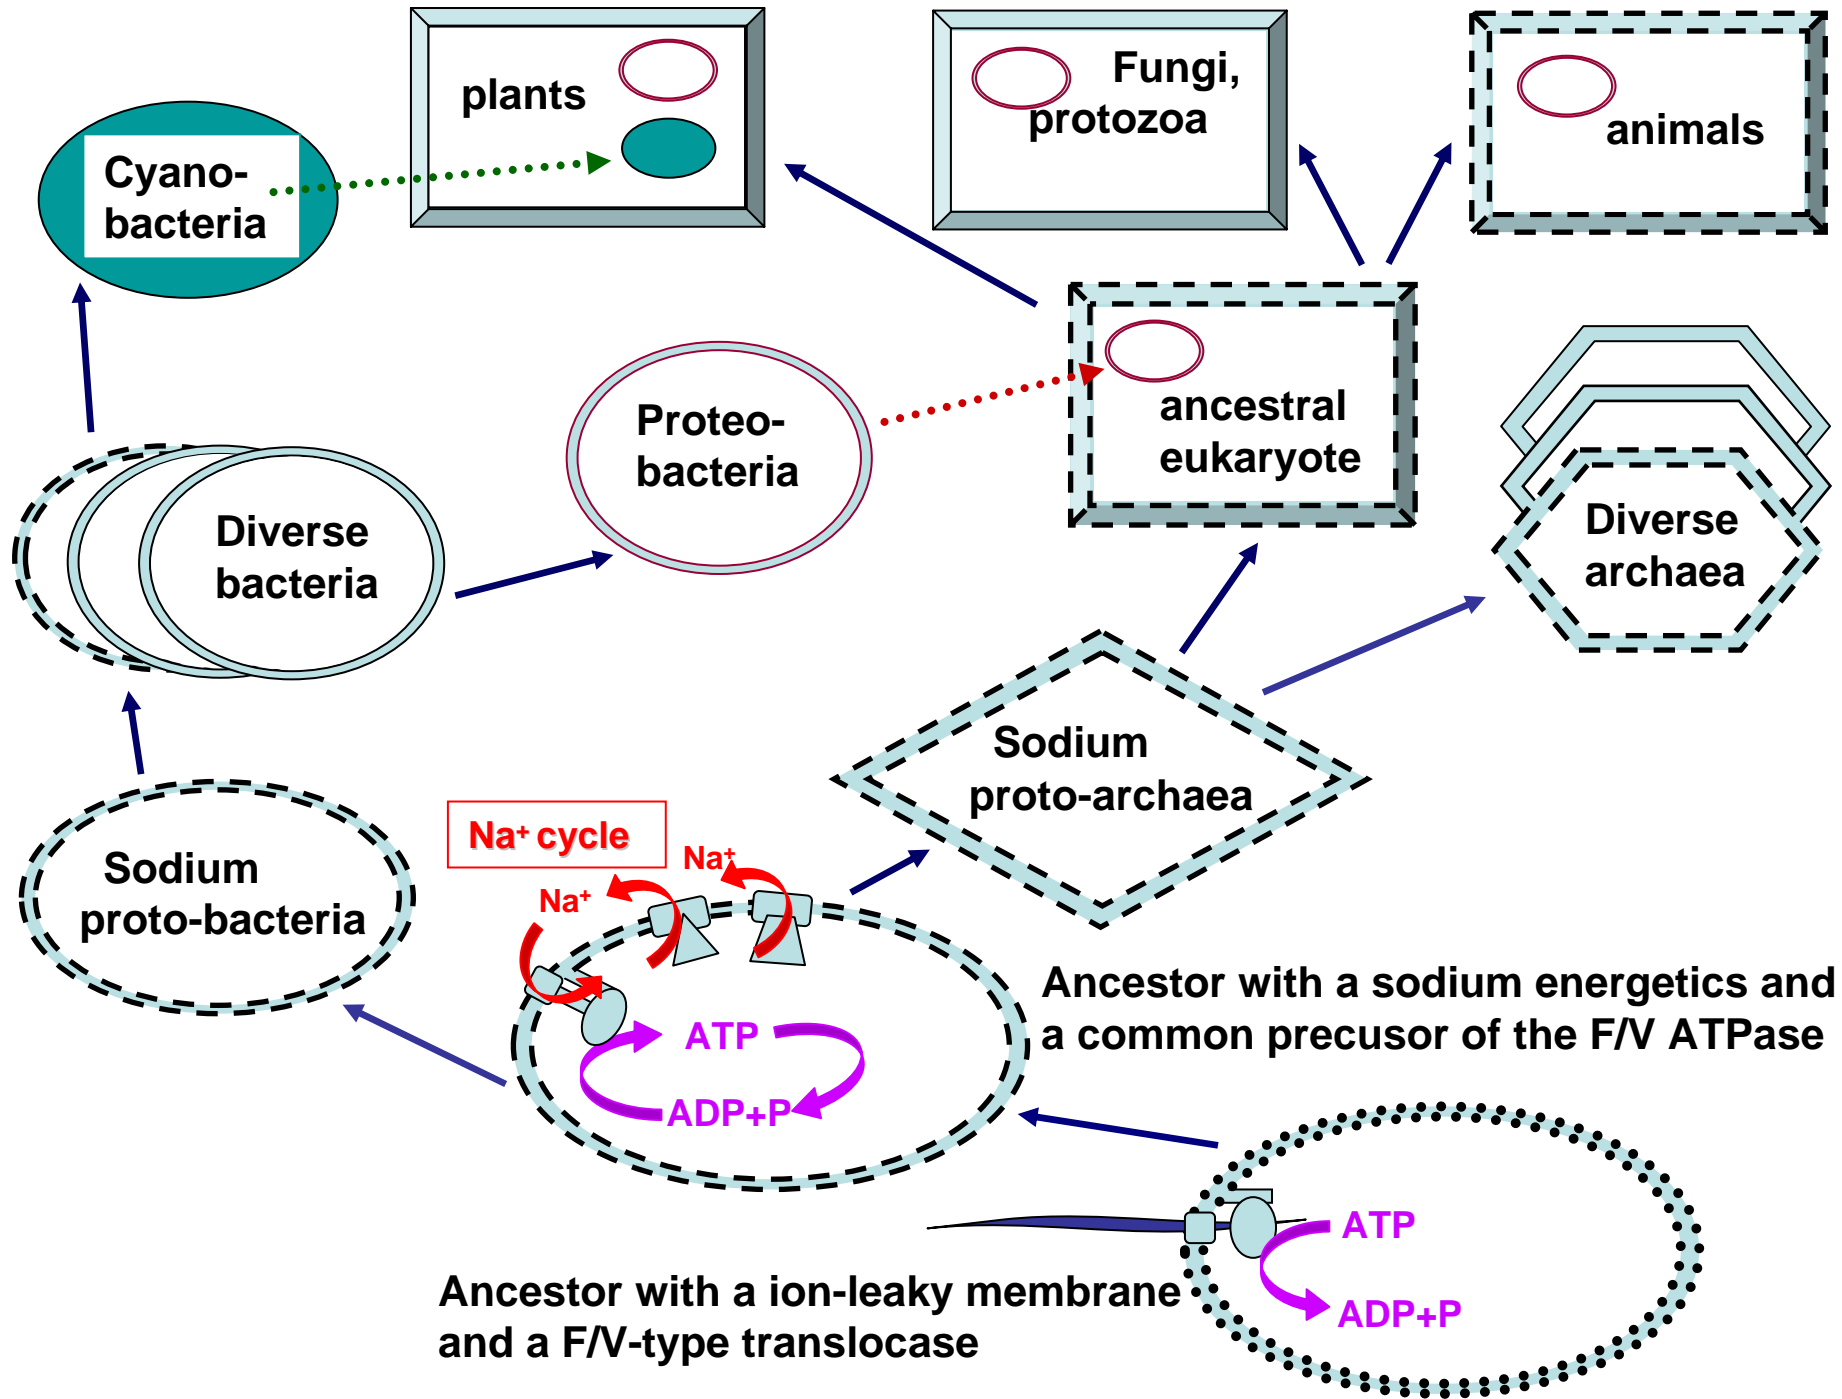

Supplement: 13062_2008_91_MOESM9_ESM.pdf [file 13062_2008_91_MOESM9_ESM.pdf]
